# Supplementary material for: Expression analysis of the osteoarthritis genetic susceptibility mapping to the matrix Gla protein gene MGP
Source: Arthritis Res Ther. 2019 Jun 18;21:149. doi: 10.1186/s13075-019-1934-7 (PMC6582465; doi:10.1186/s13075-019-1934-7)
Supplement: Supplementary file 1 — Table S1. Details of the 165 osteoarthritis patients included in this study. (XLSX 15 kb) [file 13075_2019_1934_MOESM1_ESM.xlsx]

## Sheet: Patient information
Supplementary Table 1
Details of the 165 osteoarthritis patients included in this study.
Patient number	Joint site	Age at surgery (years)	Sex
3082	knee	61	M
3125	hip	74	M
3136	knee	81	M
3198	knee	66	M
3215	knee	74	F
3280	knee	87	F
3334	knee	73	F
3370	knee	78	F
3458	knee	71	F
3502	knee	67	M
3511	knee	67	F
3686	knee	80	F
3697	knee	65	F
3912	knee	73	F
4244	knee	78	M
4277	knee	79	F
4396	knee	83	M
4433	knee	70	F
4448	knee	61	F
4449	knee	85	M
4459	knee	76	F
4460	knee	72	F
4545	hip	81	M
4552	knee	82	F
4578	knee	52	M
4579	hip	75	M
4580	knee	70	F
4586	knee	68	F
4587	knee	76	M
4589	knee	69	F
4596	knee	73	M
4597	knee	58	M
4599	knee	67	F
4601	knee	60	F
4605	knee	70	F
4606	knee	75	F
4607	knee	74	F
4608	knee	57	M
4610	hip	86	F
4613	knee	78	F
4629	knee	72	F
4643	hip	74	F
4644	hip	83	M
4657	knee	69	M
4673	knee	66	F
4675	hip	78	F
4676	knee	67	M
4677	knee	85	F
4793	hip	73	F
4851	knee	58	M
4984	knee	68	F
5150	hip	70	F
5175	knee	79	F
5240	knee	62	F
5254	knee	62	F
5281	knee	59	F
5293	hip	73	M
5299	knee	75	F
5345	knee	67	F
5380	knee	72	M
5479	knee	67	M
5506	knee	71	F
5512	knee	66	F
5518	hip	67	M
5541	knee	53	M
5561	knee	71	F
5575	knee	72	F
5613	knee	57	M
5692	knee	66	F
5700	knee	81	F
5720	knee	68	M
5726	hip	82	F
5729	knee	58	F
5740	knee	87	F
5762	hip	70	M
5818	knee	69	F
5834	knee	72	M
5847	knee	70	M
5848	knee	75	M
5851	hip	61	M
5854	knee	75	M
5865	hip	66	F
5980	knee	82	M
6009	knee	59	F
6015	knee	74	M
6019	knee	81	F
6024	hip	47	M
6052	knee	76	M
6056	knee	68	F
6062	knee	63	F
6068	knee	59	F
6094	knee	54	F
6102	knee	70	F
6111	knee	81	M
6135	knee	71	M
6201	hip	62	M
6211	knee	86	M
6213	knee	54	F
6222	knee	75	F
6224	knee	63	F
6241	knee	90	F
6247	knee	51	M
6252	hip	55	F
6334	knee	85	F
6335	hip	54	F
6349	knee	59	F
6362	knee	74	M
6363	knee	58	F
6384	knee	90	F
6387	knee	63	F
6392	knee	61	F
6402	hip	69	M
6506	knee	59	F
6535	knee	68	M
6548	knee	81	F
6549	knee	45	M
6550	knee	81	F
6593	knee	73	M
6597	knee	85	M
6599	knee	81	F
6624	knee	63	M
6638	knee	72	M
6655	knee	58	M
6711	hand	71	F
6712	hand	70	F
6724	hand	82	F
6749	hand	58	F
6770	knee	80	F
6784	knee	46	F
6791	hip	60	M
6803	knee	65	F
6817	hand	56	F
6825	hand	66	F
6835	hip	26	M
6839	hand	60	M
6852	knee	84	F
6902	hand	66	M
7015	hip	64	F
7025	hip	76	F
7026	knee	58	F
7029	hip	67	F
7031	knee	58	F
7032	knee	63	F
7034	hip	60	F
7035	knee	62	F
7036	hip	88	F
7040	hip	74	M
7055	knee	71	F
7059	hip	81	M
7061	knee	73	F
7106	hand	73	F
7113	hand	53	F
7117	knee	78	M
7120	knee	62	F
7154	knee	75	M
7156	knee	75	F
7157	knee	74	M
7158	knee	71	F
7159	knee	77	F
7170	knee	50	M
7224	hand	79	F
34880	knee	65	F
444851	knee	73	F
1284908	knee	82	F
8157401	knee	82	F
Details of the 16 patients used to generate the RNA-seq data that was used in this study
Patient number	Phenotype	Joint site	Age at surgery (years)	Sex
1	OA	Hip	66	F
2	OA	Hip	76	F
3	OA	Hip	83	F
4	OA	Hip	78	F
5	OA	Hip	83	F
6	OA	Hip	60	F
7	OA	Hip	55	F
8	OA	Hip	82	F
9	OA	Hip	72	F
10	OA	Hip	72	F
11	NOF	Hip	85	F
12	NOF	Hip	71	F
13	NOF	Hip	81	F
14	NOF	Hip	72	F
15	NOF	Hip	84	F
16	NOF	Hip	94	F
